# Supplementary material
Source: HighWire-hosted journal article supplement (https://bmjopen.bmj.com/content/12/1/e054030)

**Supplementary appendix 3.** Under-five mortality rates in neighbourhoods of the Greater Accra Metropolitan Area from sensitivity analyses replacing zero MAC-5q0 estimates with **a)** 0.0001 and **b)** the minimum estimated non-zero 5q0 (0.00632). Neighbourhood boundaries are shown in grey, district boundaries are shown in black. The colour scale diverges at the mean under-five mortality rate across all GAMA neighbourhoods. Neighbourhoods with U5M above the GAMA average are shown in orange; neighbourhoods with U5M below the GAMA average are shown in purple.

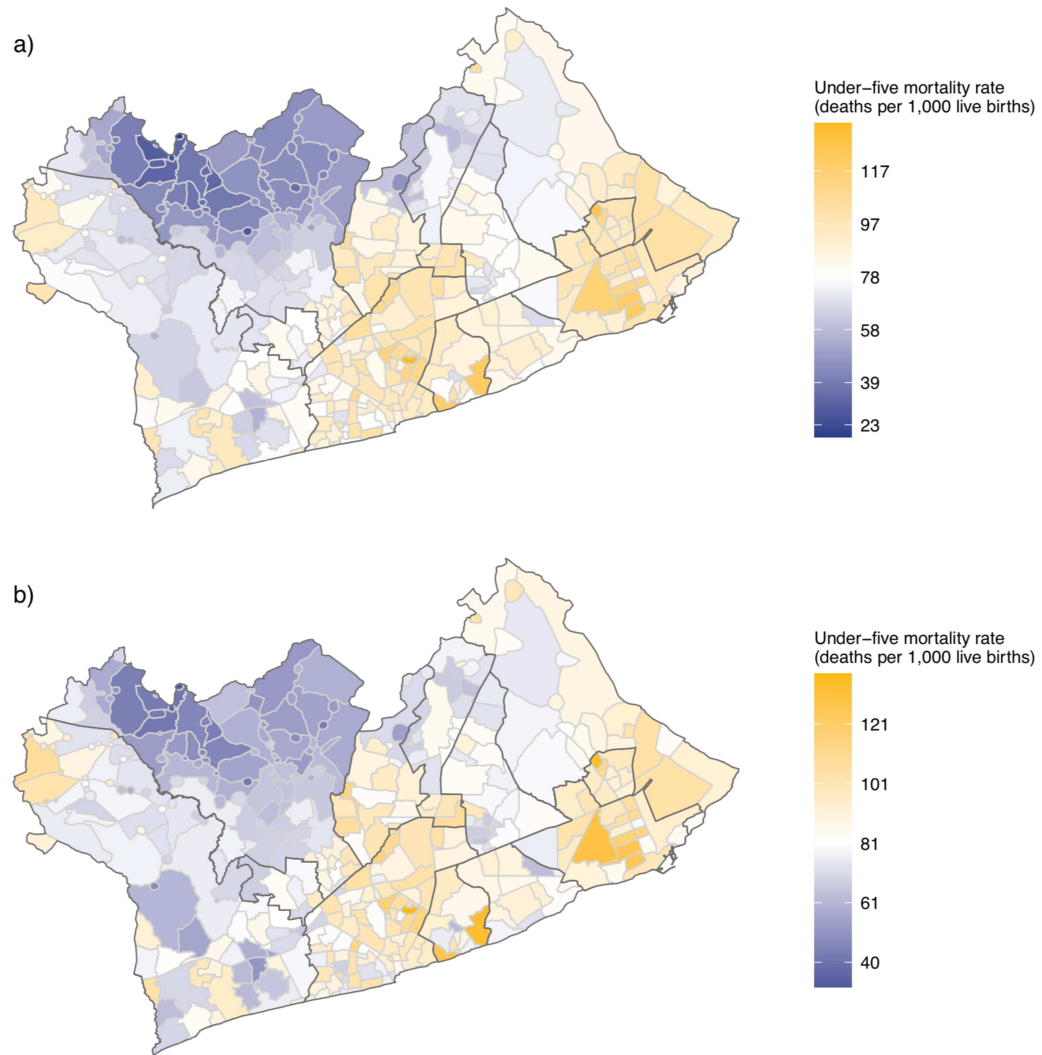

Supplement: inline-supplementary-material-3 [file inline-supplementary-material-3.pdf]
